# Supplementary material
Source: Springer Nature journal article supplement (https://www.springermedizin.de/resource/supplementary/13058_2009_2571_MOESM11_ESM.pdf/9701724)

**(a)**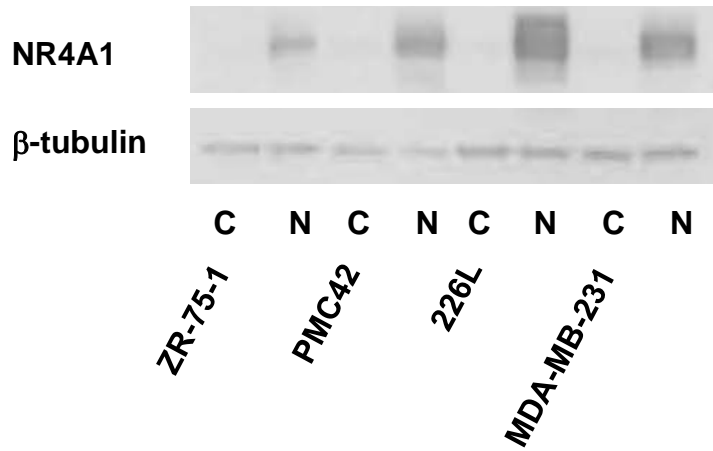**(b)**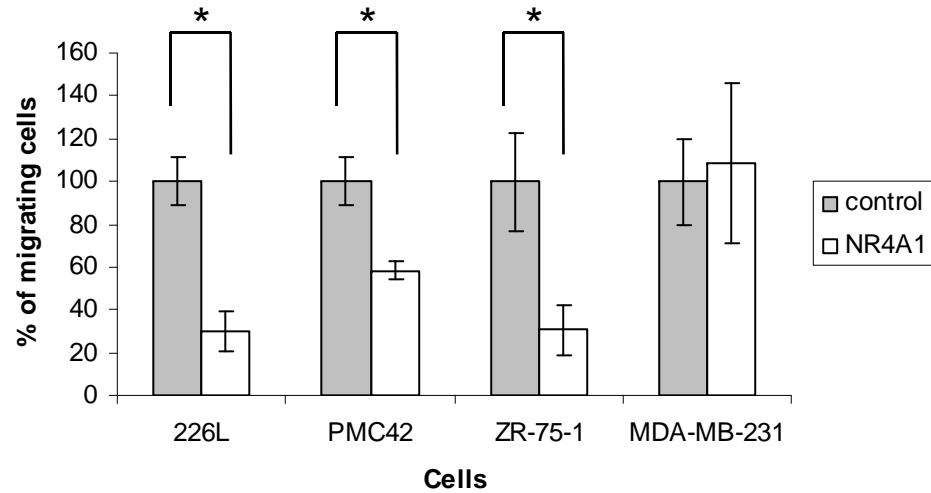**(c)**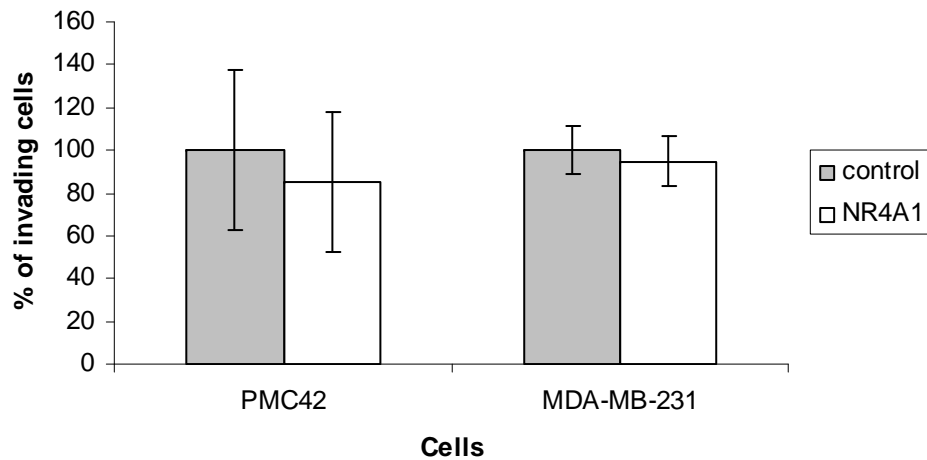

Supplement: MOESM11 [file 9701724]
